# Supplementary material
Source: publisher figshare collection journal article supplement (https://tandf.figshare.com/ndownloader/files/22412988)
Supplement: Supplementary file 1 [file 22412988]

## Sheet: Table8←Sample data
	Supplementary Table 1. Seed yield and the related chracteristics in Hokkaido, and nothern US cultivar.
			Stem		R8	Sowing	Seed		Seed		No. of		No. of		Tatal		No. of		Average		Total branch length
	Year	Cultivar	growth	Spacing(cm)	stage	|	yield		yield of		pod in		node in		branch		branch		branch		per growth period
	(Location)		habit	×	(month/	R5			branch		branch		branch		length				length		(Sowing - R5)
				Row width(cm)	day)	(day)	(g m-2)		(g m-2)		(m-2)		(m-2)		(cm/pl)		(/pl)		(cm/pl)		(g m-2 day-1)
	2012	Toyomusume	Ｄ	60×7.5	2014-09-26 08:00:00	101.067	382.945	a	203.744	a	411.44	a	226.333	b	117.133	a	4.26667	b	23.4911	a	1.15897	a
	(NARCH)	Toyomusume		60×10	2014-09-26 08:00:00	101.067	343.525	ab	206.56	a	408.593	a	319.667	a	137.667	a	4.66667	ab	29.2067	a	1.36214	a
		Toyomusume		60×20	2017-09-27	102	312.243	b	233.047	a	486.38	a	177	c	174.6	a	6.6	a	29.2991	a	1.71176	a
		Toyoharuka	Ｄ	60×7.5	2014-09-27 08:00:00	101.85	360.533	a	109.315	b	235.32	b	174.333	a	59.2667	a	2.13333	b	27.6279	a	0.581901	a
		Toyoharuka		60×10	2014-09-27 08:00:00	102	300.703	b	140.925	a	291.693	ab	146	a	70.3333	a	3.2	ab	22.2675	a	0.689542	a
		Toyoharuka		60×20	2017-09-27	102	258.125	c	164.573	a	345.833	a	136.667	a	72.38	a	5.26667	a	26.1115	a	0.709608	a
		Yuzuru	Ｄ	60×7.5	2014-10-13 16:00:00	105.833	404.485	a	151.571	b	225.7	c	232.667	a	114.773	c	1.46667	b	49.4868	a	1.08447	a
		Yuzuru		60×10	2014-10-13 08:00:00	106	358.955	b	171.297	b	308.393	b	269.667	a	131.333	b	3.06667	b	46.127	a	1.23899	a
		Yuzuru		60×20	2017-10-13	106	331.974	b	217.223	a	437.133	a	275	a	246.333	a	5.33333	a	46.2376	a	2.3239	a
		Athow	Ｉ	60×7.5	2014-10-19 08:00:00	112	408.323	a	133.197	c	310.8	c	266.333	b	102.2	c	2.86667	c	36.1074	b	0.9125	c
		Athow		60×10	2014-10-19 08:00:00	112	466.125	a	205.546	b	574.48	b	438.667	a	204.067	b	5	b	40.8641	ab	1.82202	b
		Athow		60×20	2017-10-20	113	421.436	a	291.551	a	807.313	a	432	a	336.8	a	6.4	a	52.863	a	2.98053	a
		Jack	Ｉ	60×7.5	2014-10-14	108	368.998	a	89.447	c	350.76	c	225.414	c	106.667	c	3.66667	c	29.2825	c	0.987654	c
		Jack		60×10	2014-10-14 08:00:00	108	395.61	a	200.82	b	696.39	b	473.333	a	235.867	b	5.4	b	43.6576	b	2.18395	b
		Jack		60×20	2017-10-14	108	377.708	a	260.677	a	803.993	a	408	b	326.22	a	6.93333	a	52.3722	a	3.02056	a
		LD00-3309	Ｉ	60×7.5	2017-10-26	121	431.894	a	189.538	c	608.28	c	318.182	c	122.1	c	4.86667	b	48.1857	b	1.00909	c
		LD00-3309		60×10	2017-10-26 08:00:00	121	405.436	ab	228.211	b	748.16	b	514.667	a	285.267	b	6.26667	ab	45.6952	b	2.35758	b
		LD00-3309		60×20	2017-10-27	122	389.062	b	291.717	a	821.7	a	665	b	491.8	a	8	a	61.7157	a	4.03115	a
	2013	Toyomusume	Ｄ	60×7.5	2013-09-26	83.55	399.272	a	250.635	a	604.444	a	359	a	116.9	a	5.4	a	21.2486	a	1.39916	a
	(RGU)	Toyomusume		60×10	2013-09-26	83.55	286.876	b	180.208	b	546.667	a	300	b	116.4	a	5.5	a	21.2169	a	1.39318	a
		Toyomusume		60×20	2013-09-26	84.2	303.586	b	177.064	b	340	b	265.333	c	132.2	a	5.3	a	25.0548	a	1.57007	a
		Toyoharuka	Ｄ	60×7.5	2013-09-25	83.2	299.338	b	111.198	a	357.778	a	198.333	a	73.7	a	3.8	b	19.3947	a	0.885817	a
		Toyoharuka		60×10	2013-09-25	83.2	332.026	a	134.821	a	291.667	b	178.333	a	69.5	a	3.6	b	19.1399	a	0.835337	a
		Toyoharuka		60×20	2013-09-25	82.55	243.289	c	127	a	236.667	b	157.333	a	78.3	a	5	a	15.9783	a	0.948516	a
		Yuzuru	Ｄ	60×7.5	2013-10-23	98.85	302.346	a	129.06	b	208.889	b	317.667	c	125.7	b	4.06667	b	31.2978	a	1.27162	a
		Yuzuru		60×10	2013-10-22	97.85	341.201	a	178.417	a	322.222	a	367.667	b	174.333	a	5.46667	a	31.9392	a	1.78164	a
		Yuzuru		60×20	2013-10-22	98.5	277.611	a	175.966	a	227.778	b	412.667	a	193.333	a	5.73333	a	33.6695	a	1.96277	a
		Athow	Ｉ	60×7.5	2013-10-24	103	326.361	a	92.0792	c	304.111	b	186	c	96.2	c	3.9	b	21.9329	a	0.933981	a
		Athow		60×10	2013-10-24	104	355.22	a	154.528	b	378.333	b	256.667	b	126.7	b	4.6	ab	26.0179	a	1.21827	a
		Athow		60×20	2013-10-27	103.85	320.233	a	207.766	a	497.25	a	353.333	a	285.5	a	6	a	34.8683	b	2.74916	b
		Jack	Ｉ	60×7.5	2013-10-23	100.04	348.706	a	143.166	a	463.704	b	306	c	140.1	c	4.93333	b	33.8283	b	1.40044	c
		Jack		60×10	2013-10-22	99.67	296.575	a	161.798	a	424.444	b	393	b	214.533	b	5.46667	b	38.6692	b	2.15244	b
		Jack		60×20	2013-10-21	99.93	302.797	a	220.553	a	552.222	a	602.333	a	406.083	a	7.13333	a	52.9463	a	4.06368	a
		LD00-3309	Ｉ	60×7.5	2013-11-01	107.78	368.127	a	119.627	c	402.222	b	412	c	181.872	c	4.7	c	39.7637	c	1.68744	c
		LD00-3309		60×10	2013-10-30	105.78	377.938	a	148.312	b	806.667	a	699	b	401.1	b	6.9	b	58.2614	b	3.79183	b
		LD00-3309		60×20	2013-10-31	106.15	375.762	a	173.894	a	846.083	a	947	a	587.447	a	8	a	70.8931	a	5.53412	a
		ANOVA		Cultivar(C)			***		***		***		***		***		***		***		*
				Density(D)			**		***		***		***		***		***		***		***
				Year(Y)			**		ns		**		**		ns		**		**		**
				C×D			*		**		***		***		***		**		***		***
				C×Y			**		*		**		**		***		*		*		**
				D×Y			ns		*		**		**		*		*		*		ns
				C×D×Y			ns		ns		**		**		†		ns		ns		*
		D and I indicate determinate type, indeterminate type, respectively.
		†, *, **, ***, and ns indicate significance at the 10%, 5%, 1%, and 0.1% levels, and not significant, respectively.
		Means followed by the same letters in the same column are not significantly different at the 5% level, as determined by the Tukey-Kramer test.
		NARCH: National agriculture research center for Hokkaido region
		RGU: Rakuno Gakuen University
